# Supplementary material for: Auxiliary-assisted chemical ubiquitylation of NEMO and linear extension by HOIP
Source: PubMed Central journal article supplement (PMC6962051; doi:10.1038/s42004-019-0211-7), 2019-09-19
Supplement: EMS85226-supplement-sup_info.pdf [file EMS85226-supplement-sup_info.pdf]

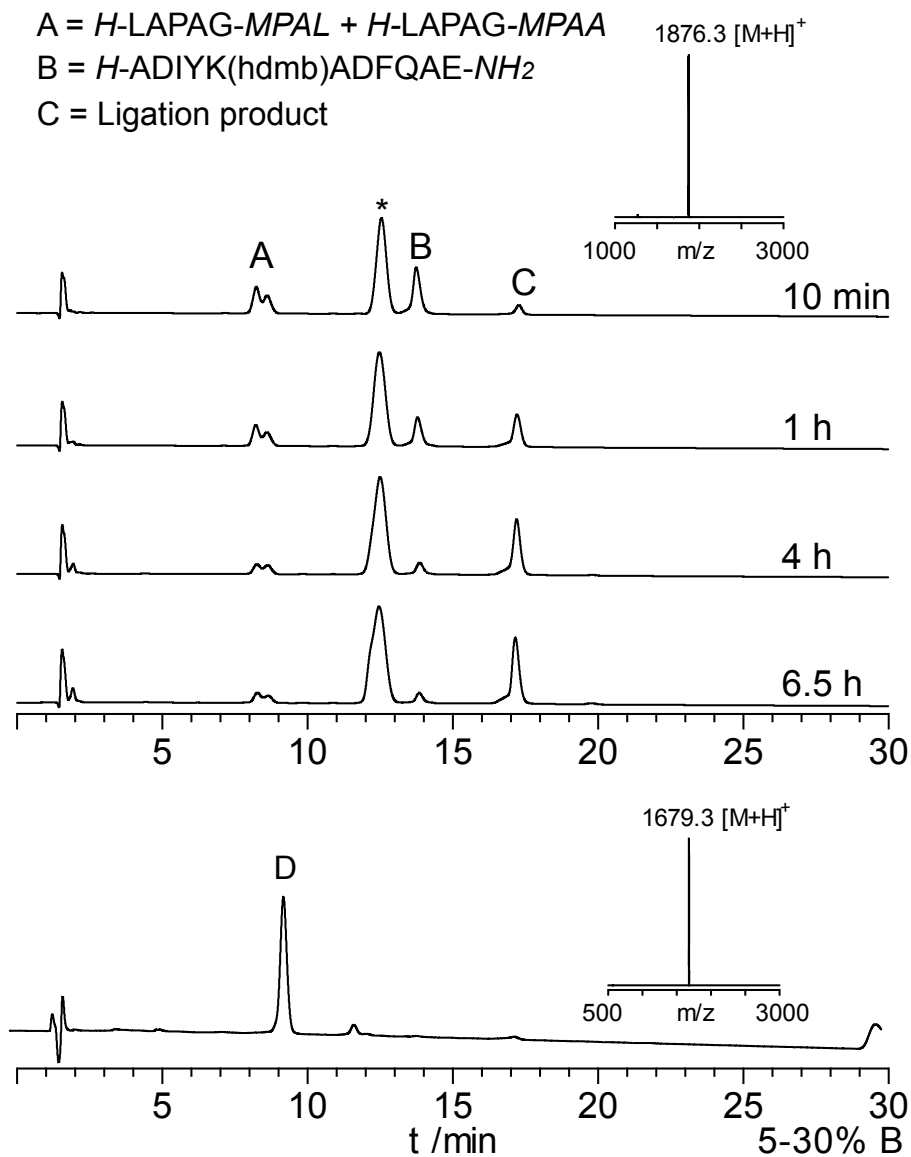

**Supplementary Figure 1.** Model ligation of NEMO<sub>298-308</sub>hdmb with LAPAG-MPAL. Time-course monitoring of ligation reaction by analytical HPLC, RP-C18, (2  $\mu$ L aliquots of the reaction mixture diluted in 10  $\mu$ L H<sub>2</sub>O were injected) and MALDI-TOF MS of purified peptide C (ligation product with hdmb auxiliary),  $m/z = 1873.6$  [M+H]<sup>+</sup>, calc. = 1876.9, \* = MPAA. Analytical HPLC of crude product after hdmb removal from purified peptide C and MALDI-TOF MS,  $m/z = 1679.3$  [M+H]<sup>+</sup>, calc. = 1679.8, D = ligation product without hdmb.

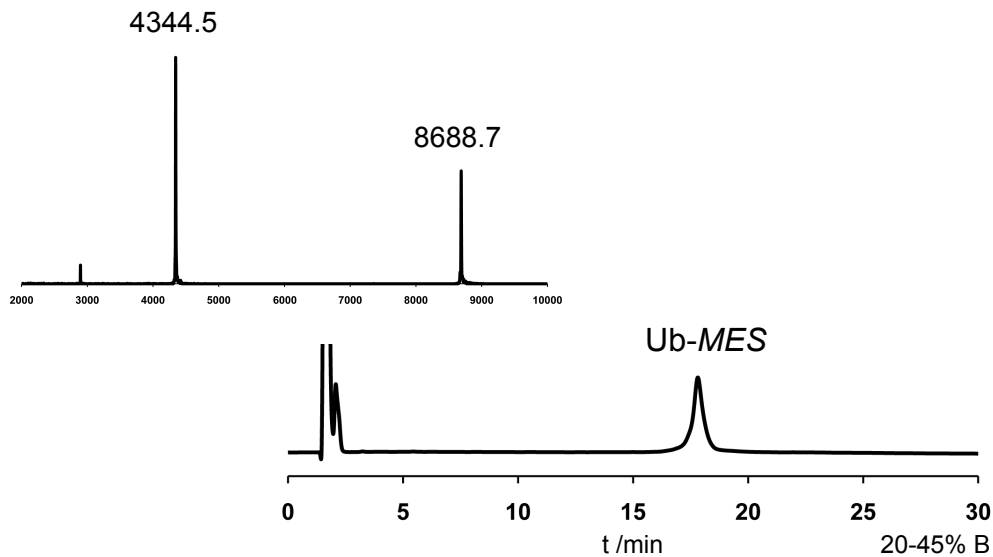

**Supplementary Figure 2.** Synthesis of Ub-MES thioester by N,S acyl transfer and thioester exchange from Ub- $\alpha$ MeCys. Analytical HPLC (RP-C18) and MALDI-TOF MS of Ub-MES,  $m/z = 8689$   $[M+H]^+$ , calc. Av. = 8689.

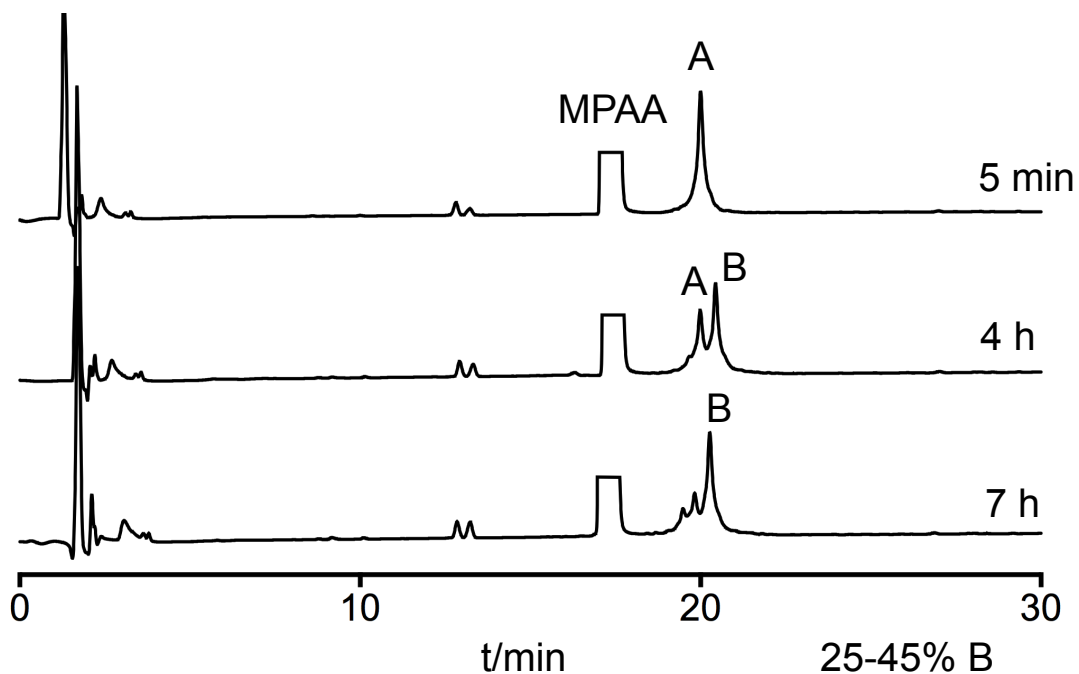

**Supplementary Figure 3.** Time course of Ub-MPAA thioester synthesis by N,S acyl transfer and thioester exchange from Ub- $\alpha$ MeCys monitored by analytical HPLC (RP-C18) injecting 10  $\mu$ L aliquots of the reaction mixture. A = Ub- $\alpha$ MeCys, B = Ub-MPAA thioester.

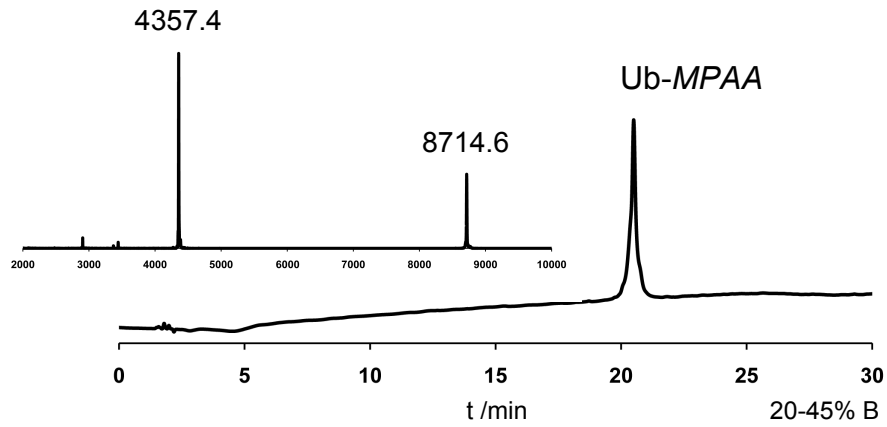

**Supplementary Figure 4.** Analytical HPLC (RP-C18) and MALDI-TOF MS of purified Ub-MPAA,  $m/z = 8715$   $[M+H]^+$ , calc. Av. = 8715.

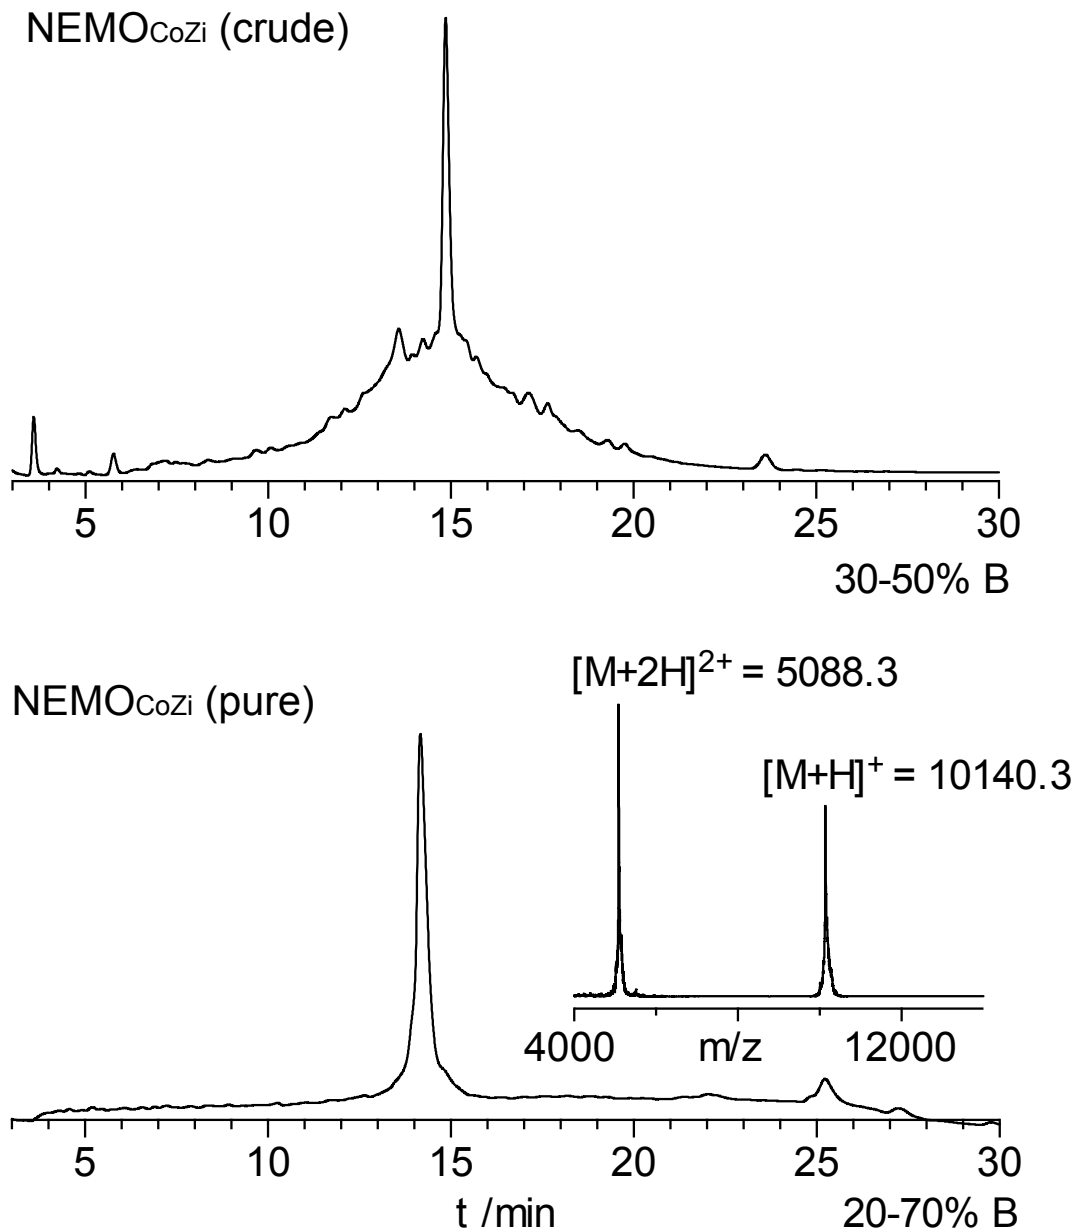

**Supplementary Figure 5.** Analytical HPLC (RP-C18) of crude and purified NEMO<sub>CoZi</sub> (after removal of Alloc). *Biotin*-EDLRQQLQQAEELVAKQELIDKLKEEAEQHKIVMETVPV LKAQADIYKADFQAERHAREKLVEKKEYLQEQLEQLQREFNKL-NH<sub>2</sub>. Insert shows MALDI-TOF MS, m/z = 10140 [M+H]<sup>+</sup>, calc. Av. = 10144.

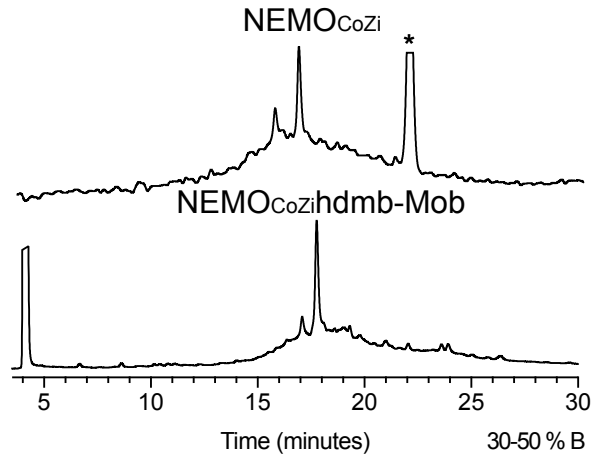

**SupplementaryFigure 6.** On-resin installation of the ligation auxiliary hdmb (**3**) into  $\text{NEMO}_{\text{CoZi}}$ . Analytical HPLC (RP-C18) of crude  $\text{NEMO}_{\text{CoZi}}$  and  $\text{NEMO}_{\text{CoZi}}\text{hdmb-Mob}$ . \* = scavenger

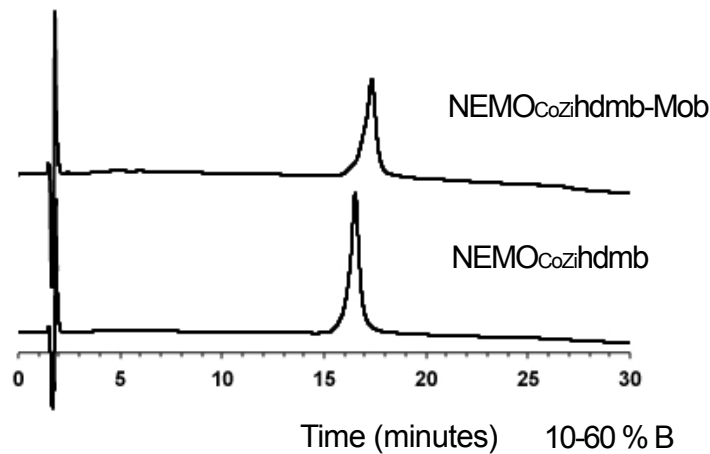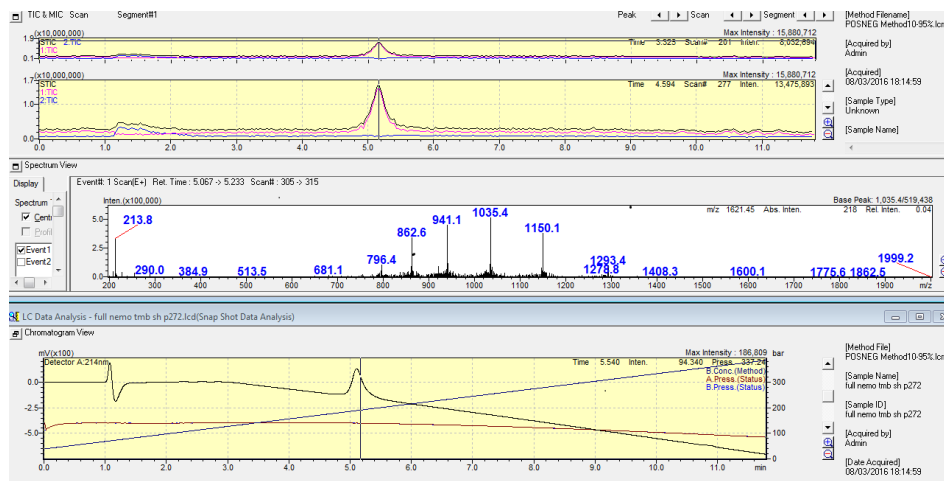

**Supplementary Figure 7.** Removal of Mob protecting group in solution. Analytical HPLC (RP-C18) of pure  $\text{NEMO}_{\text{CoZi}}\text{hdmb-Mob}$  and  $\text{NEMO}_{\text{CoZi}}\text{hdmb}$  and LCMS of  $\text{NEMO}_{\text{CoZi}}\text{hdm}$   $m/z = 10342$   $[\text{M}+\text{H}]^+$ , calc. Av. = 10342.

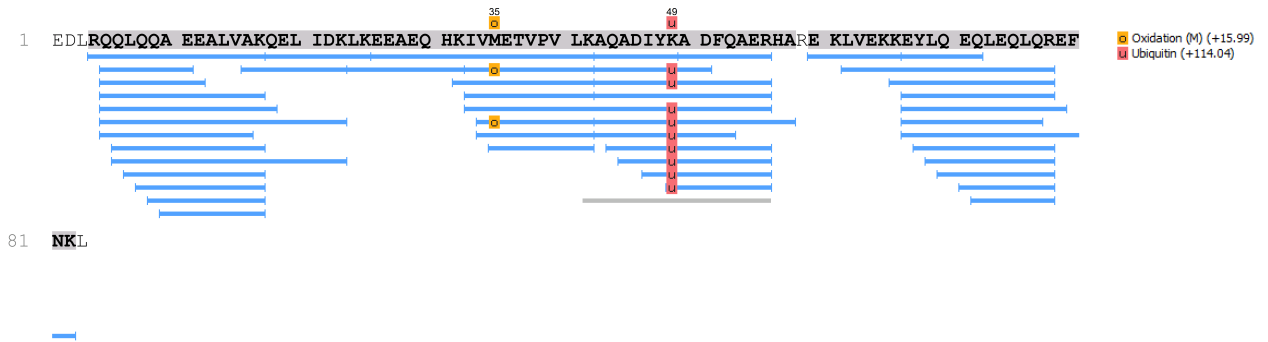

**Supplementary Figure 8.** Sequence coverage of NEMO<sub>CoZi</sub>-Ub derived from LC-MSMS indicating ubiquitylation site (red). Oxidation of Met<sup>35</sup> was also detected (orange).

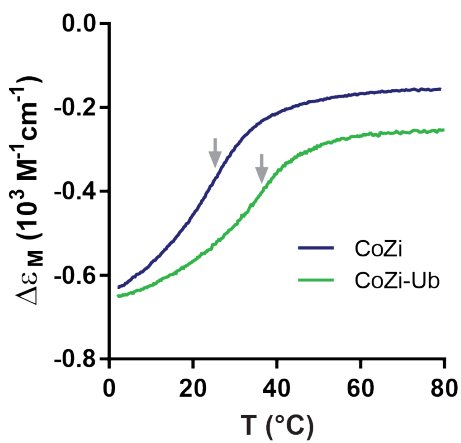

**Supplementary Figure 9.** Comparison of thermal melting curves of synthetic NEMO<sub>CoZi</sub>-Ub (8 μM) and NEMO<sub>CoZi</sub> (16 μM), measured by circular dichroism at 222 nm. The melting temperatures (grey arrows) of NEMO<sub>CoZi</sub>-Ub and NEMO<sub>CoZi</sub> are 36.4 °C and 24.9 °C, respectively.

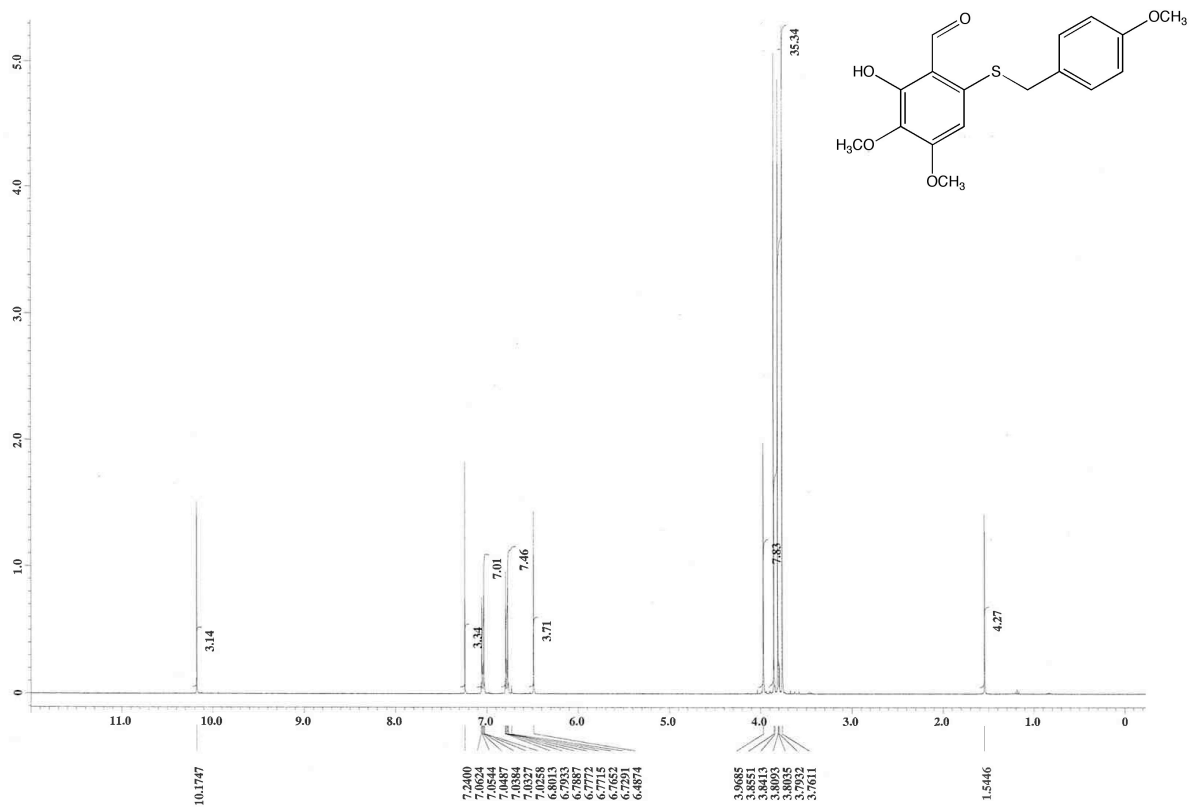

Supplementary Figure 10. <sup>1</sup>H NMR of hdm b aldehyde 3.
